# Supplementary material
Source: PubMed Central journal article supplement (PMC4618025)
Supplement: NIHMS718027-supplement-003047_-_Supplemental_Material.pdf [file NIHMS718027-supplement-003047_-_Supplemental_Material.pdf]

## Supplemental Material

**Supplemental Table 1:** Pacing protocol to reproduce pentageminal PVCs (20% PVC burden) and tachycardia (rapid pacing) from 4 different origins as performed in each animal. A single PAC coupling cycle length was performed due to decremental conduction of the AV node resulting in variable and unpredictable R-R interval.

| <b><i>Location</i></b> | <b><i>Rapid pacing</i></b> | <b><i>PVC coupling Interval (ms)</i></b> |     |     |     |
|------------------------|----------------------------|------------------------------------------|-----|-----|-----|
| <i>LA appendage</i>    | 400                        | 200                                      | NA  | NA  | NA  |
| <i>RV apex</i>         | 400                        | 200                                      | 250 | 300 | 375 |
| <i>RVOT</i>            | 400                        | 200                                      | 250 | 300 | 375 |
| <i>LV free wall</i>    | 400                        | 200                                      | 250 | 300 | 375 |

**Supplemental Table 2:** Multiple comparisons of dispersion of QRS-to-Peak Strain (ms) between different PAC and PVC coupling intervals by different locations. *Significant differences are indicated by bold p-values. Inference and confidence intervals were adjusted for multiple comparisons within each location using a Bonferroni-corrected significance value of: (\*) 0.005 (†) 0.05. Note: All coupling intervals (200, 250, 300, 375ms) represent ectopic beats, except for 400ms (150 bpm), which represents rapid ventricular and atrial pacing, respectively. RV= RV apex, RVOT= RV outflow tract, LV = LV free wall.*

| Location   | Coupling Interval<br>Difference | Estimate | Adjusted 95% CI | P                 |
|------------|---------------------------------|----------|-----------------|-------------------|
| LV PVC *   | 250-200                         | 53       | (-20, 124)      | 0.0365            |
|            | 300-200                         | 42       | (-30, 114)      | 0.0926            |
|            | <b>375-200</b>                  | 146      | (67, 226)       | <b>&lt;0.0001</b> |
|            | 400-200                         | -17      | (92, 59)        | 0.52              |
|            | 300-250                         | -11      | (-83, 61)       | 0.66              |
|            | <b>375-250</b>                  | 94       | (14, 173)       | <b>0.0011</b>     |
|            | 400-250                         | -69      | (-144, 6)       | 0.0093            |
|            | <b>375-300</b>                  | 104      | (25, 184)       | <b>0.0004</b>     |
| RV PVC *   | 400-300                         | -58      | (-134, -17)     | 0.0262            |
|            | <b>400-375</b>                  | -163     | (-245, -81)     | <b>&lt;0.0001</b> |
|            | 250-200                         | 18       | (-54, 90)       | 0.47              |
|            | <b>300-200</b>                  | 79       | (6.4, 151)      | <b>0.0024</b>     |
|            | <b>375-200</b>                  | 125      | (45, 204)       | <b>&lt;0.0001</b> |
|            | 400-200                         | 10       | (-65, 85)       | 0.69              |
|            | 300-250                         | 61       | (-11, 133)      | 0.0166            |
|            | <b>375-250</b>                  | 107      | (27, 186)       | <b>0.0003</b>     |
| RVOT PVC * | 400-250                         | -7.8     | (-83, 67)       | 0.76              |
|            | 375-300                         | 46       | (-33, 125)      | 0.0930            |
|            | 400-300                         | -68      | (-144, 6.8)     | 0.0100            |
|            | <b>400-375</b>                  | -163     | (-245, -81)     | <b>&lt;0.0001</b> |
|            | 250-200                         | 38       | (-34, 110)      | 0.17              |
|            | 300-200                         | 46       | (-26, 118)      | 0.0650            |
|            | <b>375-200</b>                  | 106      | (26, 185)       | <b>0.0003</b>     |
|            | 400-200                         | -21      | (-96, 54)       | 0.41              |
| PAC †      | 300-250                         | 8.1      | (-64, 80)       | 0.74              |
|            | 375-250                         | 68       | (-12, 147)      | 0.0151            |
|            | 400-250                         | -59      | (-134, 16)      | 0.0248            |
|            | 375-300                         | 60       | (-20, 139)      | 0.0312            |
|            | 400-300                         | -67      | (-142, 8)       | 0.0113            |
|            | <b>400-375</b>                  | -127     | (-209, -44)     | <b>&lt;0.0001</b> |
|            | 375-300                         | 30       | (-43, 101)      | 0.42              |

**Supplemental Table 3:** Multiple comparisons of dispersion of QRS-to-Peak Strain (ms) between ectopic beats locations (LV, RV and RVOT PVC and PAC) at 200, 250, 300 and 375ms; and rapid ventricular pacing (VP) at 400ms. Significant differences are indicated by **bold p-values**. Inference and confidence intervals were adjusted for multiple comparisons within each location using a Bonferroni-corrected significance value of: (\*) 0.017 (†) 0.008. RV= RV apex, RVOT= RV outflow tract, LV = LV free wall.

| Coupling Interval | Location Difference | Estimate | Adjusted 95% CI | P                 |
|-------------------|---------------------|----------|-----------------|-------------------|
| 200 *             | LV-RV               | -7.3     | (-68, 54)       | 0.77              |
|                   | RVOT-LV             | 12       | (-49, 72)       | 0.63              |
|                   | RVOT-RV             | 4.4      | (-56, 65)       | 0.86              |
| 250 *             | LV-RV               | 27       | (-33, 88)       | 0.27              |
|                   | RVOT-LV             | -3.0     | (-64, 58)       | 0.90              |
|                   | RVOT-RV             | 24       | (-36, 85)       | 0.32              |
| 300 †             | LV-RV               | -44      | (-93, 5.0)      | 0.0776            |
|                   | <b>LV-PAC</b>       | 122      | (-33, 65)       | <b>0.0004</b>     |
|                   | RVOT-LV             | 16       | (-77, 21)       | 0.52              |
|                   | <b>RVOT-PAC</b>     | 138      | (112, 24)       | <b>&lt;0.0001</b> |
|                   | RVOT-RV             | -28      | (34, 211)       | 0.25              |
|                   | <b>RV-PAC</b>       | 166      | (-52, 84)       | <b>&lt;0.0001</b> |
| 375 †             | LV-RV               | 14       | (-66, 95)       | 0.62              |
|                   | <b>LV-PAC</b>       | 198      | (78, 255)       | <b>&lt;0.0001</b> |
|                   | RVOT-LV             | -29      | (-110, 51)      | 0.32              |
|                   | <b>RVOT-PAC</b>     | 169      | (83, 254)       | <b>&lt;0.0001</b> |
|                   | RVOT-RV             | -15      | (-95, 66)       | 0.61              |
|                   | <b>RV-PAC</b>       | 183      | (98, 269)       | <b>&lt;0.0001</b> |
| 400 †             | LV-RV               | -34      | (-100, 32)      | 0.20              |
|                   | RVOT-LV             | 7.2      | (-58, 73)       | 0.79              |
|                   | RVOT-RV             | -27      | (-92, 39)       | 0.31              |

**Supplemental Table 4:** Multiple comparisons of dispersion of stroke volume (mL) between different PAC and PVC coupling intervals by different locations. *Significant differences are indicated by bold p-values. Inference and confidence intervals were adjusted for multiple comparisons within each location using a Bonferroni-corrected significance value of: (\*) 0.005 (†) 0.017. Note: Note: All coupling intervals (200, 250, 300, 375ms) represent ectopic beats, except for 400ms (150 bpm), which represents rapid ventricular and atrial pacing in PVCs and PAC, respectively. RV= RV apex, RVOT= RV outflow tract, LV = LV free wall.*

| Location   | Coupling Interval Difference | Estimate | 95% CI       | P                 |
|------------|------------------------------|----------|--------------|-------------------|
| LV PVC *   | <b>250-200</b>               | 2.4      | (1.5, 3.4)   | <b>&lt;0.0001</b> |
|            | <b>300-200</b>               | 5.7      | (4.8, 6.6)   | <b>&lt;0.0001</b> |
|            | <b>375-200</b>               | 9.7      | (8.8, 10.6)  | <b>&lt;0.0001</b> |
|            | <b>400-200</b>               | 13.9     | (13.0, 14.7) | <b>&lt;0.0001</b> |
|            | <b>300-250</b>               | 3.3      | (2.3, 4.2)   | <b>&lt;0.0001</b> |
|            | <b>375-250</b>               | 7.3      | (6.3, 8.3)   | <b>&lt;0.0001</b> |
|            | <b>400-250</b>               | 11.4     | (10.5, 12.4) | <b>&lt;0.0001</b> |
|            | <b>375-300</b>               | 4.0      | (3.0, 5.0)   | <b>&lt;0.0001</b> |
|            | <b>400-300</b>               | 8.2      | (7.3, 9.1)   | <b>&lt;0.0001</b> |
|            | <b>400-375</b>               | 4.2      | (3.3, 5.1)   | <b>&lt;0.0001</b> |
| RV PVC *   | 250-200                      | 0.8      | (-0.2, 1.7)  | 0.0232            |
|            | <b>300-200</b>               | 4.0      | (3.0, 4.2)   | <b>&lt;0.0001</b> |
|            | <b>375-200</b>               | 7.7      | (6.7, 8.0)   | <b>&lt;0.0001</b> |
|            | <b>400-200</b>               | 14.4     | (13.5, 14.5) | <b>&lt;0.0001</b> |
|            | <b>300-250</b>               | 3.2      | (2.2, 4.2)   | <b>&lt;0.0001</b> |
|            | <b>375-250</b>               | 7.0      | (5.9, 8.0)   | <b>&lt;0.0001</b> |
|            | <b>400-250</b>               | 13.7     | (12.7, 14.5) | <b>&lt;0.0001</b> |
|            | <b>375-300</b>               | 3.8      | (2.7, 4.8)   | <b>&lt;0.0001</b> |
|            | <b>400-300</b>               | 10.4     | (9.5, 11.4)  | <b>&lt;0.0001</b> |
|            | <b>400-375</b>               | 6.7      | (5.7, 7.7)   | <b>&lt;0.0001</b> |
| RVOT PVC * | <b>250-200</b>               | 3.1      | (2.2, 4.1)   | <b>&lt;0.0001</b> |
|            | <b>300-200</b>               | 4.9      | (4.0, 5.9)   | <b>&lt;0.0001</b> |
|            | <b>375-200</b>               | 10.7     | (9.8, 11.6)  | <b>&lt;0.0001</b> |
|            | <b>400-200</b>               | 13.1     | (12.3, 14.0) | <b>&lt;0.0001</b> |
|            | <b>300-250</b>               | 1.8      | (0.8, 2.8)   | <b>0.0001</b>     |
|            | <b>375-250</b>               | 7.6      | (6.6, 8.5)   | <b>&lt;0.0001</b> |
|            | <b>400-250</b>               | 10.0     | (9.1, 11.0)  | <b>&lt;0.0001</b> |
|            | <b>375-300</b>               | 5.7      | (4.8, 6.7)   | <b>&lt;0.0001</b> |
|            | <b>400-300</b>               | 8.2      | (7.3, 9.1)   | <b>&lt;0.0001</b> |
|            | <b>400-375</b>               | 2.5      | (1.6, 3.4)   | <b>&lt;0.0001</b> |
| PAC †      | <b>400-300</b>               | 13.0     | (11.9, 14.0) | <b>&lt;0.0001</b> |
|            | <b>375-300</b>               | 4.3      | (3.0, 5.6)   | <b>&lt;0.0001</b> |
|            | <b>400-375</b>               | 8.7      | (7.6, 9.7)   | <b>&lt;0.0001</b> |

**Supplemental Table 5.** Multiple comparisons of dispersion of stroke volume (mL) between ectopic beats locations (LV, RV and RVOT PVC and PAC) at 200, 250, 300 and 375ms; and rapid ventricular pacing (VP) at 400ms. Significant differences are indicated by **bold p-values**. Inference and confidence intervals were adjusted for multiple comparisons within each location using a Bonferroni-corrected significance value of: (\*) 0.017 (†) 0.008. RV= RV apex, RVOT= RV outflow tract, LV = LV free wall.

| Coupling Interval | Location Difference | Estimate | 95% CI      | P                 |
|-------------------|---------------------|----------|-------------|-------------------|
| 200 *             | LV-RV               | 0.1      | (-0.7, 0.8) | 0.84              |
|                   | <b>RVOT-LV</b>      | 1.6      | (1.0, 2.3)  | <b>&lt;0.0001</b> |
|                   | <b>RVOT-RV</b>      | 1.6      | (1.0, 2.4)  | <b>&lt;0.0001</b> |
| 250 *             | <b>LV-RV</b>        | 1.7      | (1.0, 2.6)  | <b>&lt;0.0001</b> |
|                   | <b>RVOT-LV</b>      | 2.2      | (1.3, 3.1)  | <b>&lt;0.0001</b> |
|                   | <b>RVOT-RV</b>      | 4.0      | (3.1, 4.8)  | <b>&lt;0.0001</b> |
| 300 †             | <b>LV-RV</b>        | 1.8      | (1.0, 2.7)  | <b>&lt;0.0001</b> |
|                   | <b>LV-PAC</b>       | 2.9      | (1.7, 4.0)  | <b>&lt;0.0001</b> |
|                   | RVOT-LV             | 0.8      | (-0.1, 1.7) | 0.0192            |
|                   | <b>RVOT-PAC</b>     | 3.7      | (2.5, 4.9)  | <b>&lt;0.0001</b> |
|                   | <b>RVOT-RV</b>      | 2.6      | (1.6, 3.5)  | <b>&lt;0.0001</b> |
|                   | RV-PAC              | 1.2      | (-0.2, 2.0) | 0.0110            |
| 375 †             | <b>LV-RV</b>        | 2.0      | (1.0, 3.0)  | <b>&lt;0.0001</b> |
|                   | <b>LV-PAC</b>       | 2.6      | (1.5, 3.8)  | <b>&lt;0.0001</b> |
|                   | <b>RVOT-LV</b>      | 2.6      | (1.7, 3.4)  | <b>&lt;0.0001</b> |
|                   | <b>RVOT-PAC</b>     | 5.2      | (4.0, 6.3)  | <b>&lt;0.0001</b> |
|                   | <b>RVOT-RV</b>      | 4.6      | (3.6, 5.5)  | <b>&lt;0.0001</b> |
|                   | RV-PAC              | 0.6      | (-0.6, 1.6) | 0.16              |
| 400 †             | LV-RV               | -0.5     | (-1.3, 0.3) | 0.11              |
|                   | <b>LV-PAC</b>       | 1.9      | (1.0, 2.7)  | <b>&lt;0.001</b>  |
|                   | <b>RVOT-LV</b>      | 0.8      | (0.02, 1.6) | <b>0.0067</b>     |
|                   | <b>RVOT-PAC</b>     | 1.0      | (0.2, 1.9)  | <b>0.0017</b>     |
|                   | RVOT-RV             | 0.3      | (-0.5, 1.1) | 0.24              |
|                   | <b>RV-PAC</b>       | 1.4      | (0.5, 2.2)  | <b>&lt;0.0001</b> |

**Supplemental Table 6:** Multiple comparisons of dispersion of  $dP/dt_{max}$  between different PAC and PVC coupling intervals by different locations. *Significant differences are indicated by bold p-values. Inference and confidence intervals were adjusted for multiple comparisons within each location using a Bonferroni-corrected significance value of: (\*) 0.005 (†) 0.017. Note: Note: All coupling intervals (200, 250, 300, 375ms) represent ectopic beats, except for 400ms (150 bpm), which represents rapid ventricular and atrial pacing in PVCs and PAC, respectively. RV= RV apex, RVOT= RV outflow tract, LV = LV free wall.*

| Location         | Coupling Interval Difference | Estimate | 95% CI       | P                 |
|------------------|------------------------------|----------|--------------|-------------------|
| LV *             | <b>250-200</b>               | 290      | (201, 379)   | <b>&lt;0.0001</b> |
|                  | <b>300-200</b>               | 744      | (654, 833)   | <b>&lt;0.0001</b> |
|                  | <b>375-200</b>               | 934      | (845, 1023)  | <b>&lt;0.0001</b> |
|                  | <b>400-200</b>               | 1431     | (1347, 1516) | <b>&lt;0.0001</b> |
|                  | <b>300-250</b>               | 454      | (370, 538)   | <b>&lt;0.0001</b> |
|                  | <b>375-250</b>               | 644      | (561, 727)   | <b>&lt;0.0001</b> |
|                  | <b>400-250</b>               | 1141     | (1062, 1219) | <b>&lt;0.0001</b> |
|                  | <b>375-300</b>               | 190      | (106, 274)   | <b>&lt;0.0001</b> |
|                  | <b>400-300</b>               | 687      | (608, 766)   | <b>&lt;0.0001</b> |
| RV *             | <b>400-375</b>               | 497      | (419, 575)   | <b>&lt;0.0001</b> |
|                  | <b>250-200</b>               | 330      | (243, 417)   | <b>&lt;0.0001</b> |
|                  | <b>300-200</b>               | 655      | (569, 745)   | <b>&lt;0.0001</b> |
|                  | <b>375-200</b>               | 965      | (873, 1058)  | <b>&lt;0.0001</b> |
|                  | <b>400-200</b>               | 1345     | (1263, 1426) | <b>&lt;0.0001</b> |
|                  | <b>300-250</b>               | 327      | (241, 412)   | <b>&lt;0.0001</b> |
|                  | <b>375-250</b>               | 634      | (545, 726)   | <b>&lt;0.0001</b> |
|                  | <b>400-250</b>               | 1015     | (935, 1093)  | <b>&lt;0.0001</b> |
|                  | <b>375-300</b>               | 309      | (218, 400)   | <b>&lt;0.0001</b> |
| RVOT *           | <b>400-300</b>               | 688      | (608, 767)   | <b>&lt;0.0001</b> |
|                  | <b>400-375</b>               | 379      | (293, 464)   | <b>&lt;0.0001</b> |
|                  | <b>250-200</b>               | 341      | (257, 326)   | <b>&lt;0.0001</b> |
|                  | <b>300-200</b>               | 759      | (677, 841)   | <b>&lt;0.0001</b> |
|                  | <b>375-200</b>               | 879      | (799, 960)   | <b>&lt;0.0001</b> |
|                  | <b>400-200</b>               | 1179     | (1102, 1256) | <b>&lt;0.0001</b> |
|                  | <b>300-250</b>               | 418      | (331, 504)   | <b>&lt;0.0001</b> |
|                  | <b>375-250</b>               | 538      | (452, 623)   | <b>&lt;0.0001</b> |
|                  | <b>400-250</b>               | 838      | (757, 919)   | <b>&lt;0.0001</b> |
| PAC <sup>b</sup> | <b>375-300</b>               | 120      | (37, 203)    | <b>&lt;0.0001</b> |
|                  | <b>400-300</b>               | 420      | (341, 499)   | <b>&lt;0.0001</b> |
|                  | <b>400-375</b>               | 300      | (222, 377)   | <b>&lt;0.0001</b> |
|                  | <b>400-300</b>               | 1316     | (1196, 1437) | <b>&lt;0.0001</b> |
|                  | <b>375-300</b>               | 193      | (60, 326)    | <b>0.0007</b>     |
|                  | <b>400-375</b>               | 1123     | (1033, 1212) | <b>&lt;0.0001</b> |

**Supplemental Table 7:** Multiple comparisons of  $dP/dt_{max}$  between ectopic beats locations (LV, RV and RVOT PVC and PAC) at 200, 250, 300 and 375ms; and rapid ventricular pacing (VP) at 400ms. *Significant differences are indicated by bold p-values. Inference and confidence intervals were adjusted for multiple comparisons within each location using a Bonferroni-corrected significance value of: (\*) 0.017 (†) 0.008. RV= RV apex, RVOT= RV outflow tract, LV = LV free wall.*

| Coupling Interval | Location Difference | Estimate | 95% CI      | P                 |
|-------------------|---------------------|----------|-------------|-------------------|
| 200 *             | LV-RV               | 42       | (-234, 119) | 0.18              |
|                   | <b>RVOT-LV</b>      | 176      | (103, 250)  | <b>&lt;0.0001</b> |
|                   | <b>RVOT-RV</b>      | 219      | (148, 290)  | <b>&lt;0.0001</b> |
| 250 *             | LV-RV               | 2.6      | (-68, 74)   | 0.93              |
|                   | <b>RVOT-LV</b>      | 227      | (155, 300)  | <b>&lt;0.0001</b> |
|                   | <b>RVOT-RV</b>      | 230      | (157, 303)  | <b>&lt;0.0001</b> |
| 300 †             | <b>LV-RV</b>        | 129      | (49, 210)   | <b>&lt;0.0001</b> |
|                   | <b>LV-PAC</b>       | 296      | (161, 431)  | <b>&lt;0.0001</b> |
|                   | <b>RVOT-LV</b>      | 192      | (112, 271)  | <b>&lt;0.0001</b> |
|                   | <b>RVOT-PAC</b>     | 488      | (353, 622)  | <b>&lt;0.0001</b> |
|                   | <b>RVOT-RV</b>      | 321      | (241, 401)  | <b>&lt;0.0001</b> |
|                   | <b>RV-PAC</b>       | 167      | (68, 265)   | <b>0.0013</b>     |
|                   | <b>RV-PAC</b>       | 167      | (68, 265)   | <b>0.0013</b>     |
| 375 †             | LV-RV               | 11       | (-73, 94)   | 0.72              |
|                   | <b>LV-PAC</b>       | 293      | (194, 392)  | <b>&lt;0.0001</b> |
|                   | <b>RVOT-LV</b>      | 121      | (45, 198)   | <b>&lt;0.0001</b> |
|                   | <b>RVOT-PAC</b>     | 414      | (316, 513)  | <b>&lt;0.0001</b> |
|                   | <b>RVOT-RV</b>      | 132      | (49, 216)   | <b>&lt;0.0001</b> |
|                   | <b>RV-PAC</b>       | 282      | (178, 385)  | <b>&lt;0.0001</b> |
|                   | <b>RV-PAC</b>       | 282      | (178, 385)  | <b>&lt;0.0001</b> |
| 400 †             | <b>LV-RV</b>        | 129      | (60, 198)   | <b>&lt;0.0001</b> |
|                   | <b>LV-PAC</b>       | 333      | (259, 408)  | <b>&lt;0.0001</b> |
|                   | <b>RVOT-LV</b>      | 75       | (7, 144)    | <b>0.0038</b>     |
|                   | <b>RVOT-PAC</b>     | 409      | (334, 483)  | <b>&lt;0.0001</b> |
|                   | RVOT-RV             | 53       | (-15, 122)  | 0.0371            |
|                   | <b>RV-PAC</b>       | 462      | (388, 537)  | <b>&lt;0.0001</b> |
|                   | <b>RV-PAC</b>       | 462      | (388, 537)  | <b>&lt;0.0001</b> |

## **Supplemental Videos**

Supplemental Video 1. Representative case (No. 6) of short-coupled PVC (200ms) from the LV free wall region. Note the segments near the origin of short-coupled PVC (LV free wall: light blue and green segments) have their peak maximum contraction immediately after peak contraction of the preceding intrinsic normal beat, which appears as a long fused peak contraction between intrinsic and PVC beat in segments near PVC origin. Few milliseconds later, the peak contraction of segments away from PVC origin (septum: red and dark blue segments) is noted, while the first segments (near PVC origin) start relaxation.

Supplemental Video 2. Representative case (No. 6) of long-coupled PVC (375ms) from the same LV free wall region. Note the segments near the origin of a late-coupled PVC (LV free wall: light blue and green segments) have their peak radial strain after relaxation of the preceding beat is completed, causing dyskinesia of the opposite segments, while the segments away from PVC origin (septum: red and dark blue segments) have their peak contraction (radial strain) when the segments near PVC origin have already completed relaxation, leading to a visually apparent LV dyssynchrony.

Supplemental Video 3 Representative case (No. 6) of rapid VP 400ms from the LV free wall region. Note that most of the segments near the origin of VP (LV free wall: light blue and green segments) initiate their contraction after relaxation of the preceding beat is completed, followed few milliseconds later by segments away (septum: red and dark blue segments) from rapid VP site with some degree of dyssynchrony but not as prominent as PVCs despite a similar R-R interval (375ms).

Supplemental Video 4. Representative case (No. 6) of PACs 200ms (R-R interval 290 ms). Note the preserved / normal LV mechanics during PAC since all 6 segments activate almost simultaneously with their peak maximum contraction immediately after peak contraction of the preceding intrinsic normal beat.
